# Supplementary material for: Entrenched Inequalities? Class, Gender and Ethnic Differences in Educational and Occupational Attainment in England
Source: Frontiers journal article supplement (doi:10.3389/fsoc.2020.601035), 2021-01-28

**Figure 1** Graphical representation of regression of transition to A-level work on academic performance

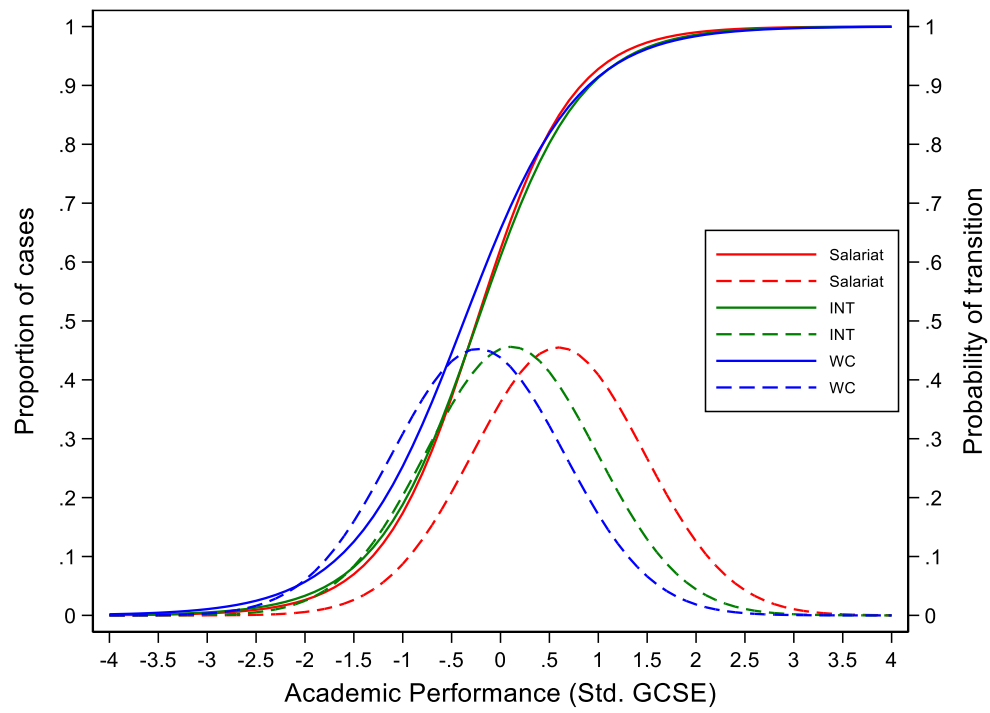

Supplement: Data_Sheet_1.PDF [file Data_Sheet_1.PDF]
