# Supplementary material for: Entrenched Inequalities? Class, Gender and Ethnic Differences in Educational and Occupational Attainment in England
Source: Frontiers journal article supplement (doi:10.3389/fsoc.2020.601035), 2021-01-28
Supplement: Table_2.DOC [file Table_2.DOC]

Table 1 Descriptive analysis of GCSE score, transition rate (%) into A-Level, university and Russel-Group (RG) university work by parental class, ethnicity and sex

|  | GCSE score | % to A-Level | % to university | % to RG university |
| --- | --- | --- | --- | --- |
| Parental class |  |  |  |  |
| Higher salariat | 55.0 | 82.2 | 67.1 | 26.2 |
| Lower salariat | 46.1 | 69.6 | 49.5 | 11.5 |
| Intermediate | 39.9 | 59.6 | 36.8 | 7.1 |
| Own account | 37.5 | 58.6 | 35.3 | 5.7 |
| Lower technical | 32.0 | 46.6 | 25.7 | 3.0 |
| Semi routine | 29.6 | 46.6 | 23.1 | 3.3 |
| Routine | 23.9 | 41.4 | 18.4 | 2.1 |
| Ethnicity |  |  |  |  |
| White | 39.7 | 60.2 | 37.8 | 9.6 |
| B Caribbean | 31.8 | 53.8 | 39.4 | 2.4 |
| B African | 36.6 | 70.1 | 60.9 | 8.1 |
| Indian | 44.9 | 78.9 | 73.9 | 12.7 |
| Pakistani | 34.8 | 68.9 | 49.2 | 7.1 |
| Bangladeshi | 34.7 | 65.8 | 52.9 | 8.0 |
| Chinese | 59.5 | 91.0 | 96.8 | 29.3 |
| Mixed | 40.3 | 61.0 | 41.9 | 10.4 |
| Other | 43.5 | 72.9 | 52.5 | 11.0 |
| Sex |  |  |  |  |
| Male | 37.3 | 58.1 | 36.5 | 8.9 |
| Female | 42.1 | 65.3 | 44.1 | 10.9 |
|  |  |  |  |  |
| (All) | 39.7 | 61.5 | 40.4 | 9.7 |
| (Approximate N) | 15,755 | 10,355 | 8,476 | 8,476 |

Notes: Weighted analysis and unweighted Ns. The weights are taken from waves 4, 6 and 7 respectively (the same below). The sample sizes become smaller over the waves but remain sufficient for analysis. Take GCSE for example. The number of respondents from higher salariat to routine origins are 1697, 4568, 1430, 1594, 1388, 2056 and 2350; for ethnicity, the numbers from white to other are 10330, 703, 748, 1010, 945, 728, 26, 822 and 417; and for gender, the numbers for men and women are 7832 and 7571 respectively.

Source: The Longitudinal Study of Young People in England (LSYPE) (the same below).

Table 2 Selected family characteristics by ethnicity: proportions (%) growing up in working-class, poorly educated, single-parent households and being eligible for free school meal (FSM)

|  | Working-class | Low education | Single-parent HH | FSM |
| --- | --- | --- | --- | --- |
| White | 23 | 17 | 29 | 11 |
| B Caribbean | 32 | 20 | 64 | 18 |
| B African | 42 | 35 | 43 | 37 |
| Indian | 31 | 35 | 16 | 12 |
| Pakistani | 45 | 60 | 17 | 39 |
| Bangladeshi | 68 | 83 | 20 | 63 |
| Chinese | 31 | 56 | 12 | 5 |
| Mixed | 23 | 21 | 41 | 20 |
| Other | 36 | 45 | 28 | 33 |
|  |  |  |  |  |
| (All) | 25 | 20 | 29 | 13 |

Table 3 Random coefficient models on GCSE scores by socio-economic attributes

|  | Model 1 | Model 2 | Model 3 |
| --- | --- | --- | --- |
| Parental class (Routine = ref) |  |  |  |
| Higher salariat | 20.55*** | 17.79*** | 10.34*** |
| Lower salariat | 15.33*** | 12.57*** | 7.60*** |
| Intermediate | 10.95*** | 8.44*** | 6.09*** |
| Own account | 8.81*** | 6.04*** | 3.72*** |
| Supervisor & technician | 5.83*** | 3.80*** | 2.21** |
| Semi routine | 4.64*** | 3.12*** | 2.66*** |
| Ethnicity (White = ref) |  |  |  |
| B Caribbean | -4.84*** | -3.25** | -4.97*** |
| B African | 1.30 | 4.01*** | 0.03 |
| Indian | 6.52*** | 7.45*** | 6.00*** |
| Pakistani | 2.47** | 5.15*** | 4.65*** |
| Bangladeshi | 6.32*** | 10.08*** | 10.36*** |
| Chinese | 16.97*** | 18.63*** | 19.08*** |
| Mixed | -0.41 | 0.72 | -0.19 |
| Other | 5.10*** | 7.05*** | 5.26** |
| Female | 4.64*** | 4.71*** | 4.67*** |
| Eligibility for FSM |  | -6.15*** | -4.53*** |
| % eligible for FSM at school level |  | -0.37*** | -0.41*** |
| Parental education (Low=ref) |  |  |  |
| Degree+ |  |  | 15.13*** |
| Sub-degree |  |  | 8.40*** |
| A-Level |  |  | 6.76*** |
| O-Level |  |  | 4.39*** |
| Family structure (two-parents=ref) |  |  |  |
| Sometimes lone-parent |  |  | -2.02*** |
| Always lone-parent |  |  | -2.32** |
| Born outside the UK |  |  | 3.03*** |
| Ethnic diversity at school level |  |  | 0.10*** |
| Constant | 24.99*** | 33.70*** | 29.00*** |
| *Random effects parameters* |  |  |  |
| var(zfsmpct) | 2.23*** | 1.77*** | 1.68*** |
| var(zdiv) | -6.48** | -5.51 | -10.07*** |
| var(_cons) | 1.86*** | 1.82*** | 1.70*** |
| var(Residual) | 2.76*** | 2.76*** | 2.73*** |
|  |  |  |  |
| (N) | 11,099 | 10,645 | 10,374 |

Note: * p < 0.05; ** p<0.01; *** p<0.001. For parental education, low refers to primary level or no formal education. In the part for random effects, zfsmpct and zdiv refer to standardised values of percentage of pupils eligible for free school meals and of ethnic diversity at the school level respectively. Stata calculates the variances for the random parameters in the form of the log of standard deviations. The values of the logs are presented in the random part.

Table 4 Average marginal effects (AME) from logit models on transition into A-Level work by socio-economic attributes

|  | Model 1 | Model 2 | Model 3 |
| --- | --- | --- | --- |
| Parental class (Routine = ref) |  |  |  |
| Higher salariat | 0.454*** | 0.037 | 0.022 |
| Lower salariat | 0.331*** | 0.005 | -0.009 |
| Intermediate | 0.230*** | -0.012 | -0.009 |
| Own account | 0.201*** | -0.013 | -0.010 |
| Supervisor & technician | 0.095*** | -0.034 | -0.031 |
| Semi routine | 0.093*** | -0.001 | -0.001 |
| Ethnicity (White = ref) |  |  |  |
| B Caribbean | -0.031 | 0.088** | 0.068* |
| B African | 0.154*** | 0.158*** | 0.107** |
| Indian | 0.215*** | 0.149*** | 0.144*** |
| Pakistani | 0.165*** | 0.166*** | 0.147*** |
| Bangladeshi | 0.181*** | 0.145*** | 0.122*** |
| Chinese | 0.318*** | 0.142 | 0.139 |
| Mixed | 0.009 | 0.028 | 0.021 |
| Other | 0.175*** | 0.132*** | 0.107** |
| Female | 0.071*** | 0.023* | 0.028** |
| GCSE |  | 0.013*** | 0.013*** |
| Eligibility for FSM |  |  | 0.025 |
| % eligible for FSM at school level |  |  | 0.000 |
| Parental education (Prim=ref) |  |  |  |
| Degree+ |  |  | 0.078*** |
| Sub-degree |  |  | 0.043* |
| A-Level |  |  | -0.001 |
| O-Level |  |  | 0.016 |
| Family structure (two-parents=ref) |  |  |  |
| Sometimes lone-parent |  |  | -0.006 |
| Always lone-parent |  |  | -0.017 |
| Born outside the UK |  |  | 0.043 |
| Ethnic diversity at school level |  |  | 0.001 |
|  |  |  |  |
| (N) | 8641 | 8641 | 7971 |

Note: * p < 0.05; ** p<0.01; *** p<0.001. For parental education, low refers to primary level or no formal education.

Table 5 Transition rate (%) into A-levels work by family class, ethnicity, sex and bands of GCSE scores

|  | Bands of GCSE scores | | |
| --- | --- | --- | --- |
|  | Low | Mid | High |
| *All* |  |  |  |
| Salariat (=ref) | 20 | 57 | 94 |
| Intermediate | 16 | 53 | 91** |
| Working class | 19 | 57 | 86*** |
| *White men* |  |  |  |
| Salariat (=ref) | 17 | 53 | 94 |
| Intermediate | 11 | 48 | 90* |
| Working class | 17 | 52 | 76*** |
| *White women* |  |  |  |
| Salariat (=ref) | 18 | 59 | 94 |
| Intermediate | 15 | 49* | 91 |
| Working class | 17 | 52 | 87** |
| *Ethnic minority men* |  |  |  |
| Salariat (=ref) | 26 | 67 | 96 |
| Intermediate | 29 | 77 | 91 |
| Working class | 26 | 72 | 95 |
| *Ethnic minority women* |  |  |  |
| Salariat (=ref) | 52 | 72 | 97 |
| Intermediate | 43 | 82 | 95 |
| Working class | 30* | 75 | 94 |
|  |  |  |  |
| (All) | 18 | 56 | 93 |

Note: The figures in this table pertain to the percentages that transition into A-Level studies. Further analysis is made on significance tests with people from salariat origins as the reference group. For instance, at the overall level (under *All*) , 86% of people from working-class origins as against 94% of salariat children made the transition to A-Level studies, with a difference of 8 percentage points, and this is significant at the 0.001 level.

Table 6 Average marginal effects (AME) from logit models on access to university and to Russell-Group (RG) universities

|  | Access to university | | Access to RG universities | |
| --- | --- | --- | --- | --- |
|  | Model 1 | Model 2 | Model 3 | Model 4 |
| Parental class (Routine = ref) |  |  |  |  |
| Higher salariat | 0.528*** | 0.144*** | 0.246*** | 0.044** |
| Lower salariat | 0.357*** | 0.100*** | 0.099*** | 0.006 |
| Intermediate | 0.224*** | 0.069** | 0.053*** | 0.001 |
| Own account | 0.187*** | 0.047* | 0.035*** | -0.008 |
| Supervisor & technician | 0.109*** | 0.024 | 0.011 | -0.012 |
| Semi routine | 0.077*** | 0.042 | 0.013* | 0.001 |
| Ethnicity (White = ref) |  |  |  |  |
| B Caribbean | 0.031 | 0.100** | -0.069*** | -0.042** |
| B African | 0.309*** | 0.258*** | -0.002 | 0.002 |
| Indian | 0.394*** | 0.326*** | 0.051** | 0.031* |
| Pakistani | 0.235*** | 0.249*** | 0.020 | 0.029 |
| Bangladeshi | 0.331*** | 0.337*** | 0.092* | 0.109** |
| Chinese | 0.598*** | 0.588*** | 0.235* | 0.111 |
| Mixed | 0.029 | 0.023 | 0.005 | -0.005 |
| Other | 0.207*** | 0.184*** | 0.041 | -0.017 |
| Female | 0.077*** | 0.048*** | 0.018** | 0.003 |
| Eligible for FSM |  | -0.015 |  | 0.006 |
| % FSM in school |  | -0.002*** |  | -0.002*** |
| Parental education (low = ref) |  |  |  |  |
| Degree+ |  | 0.150*** |  | 0.069*** |
| Sub-degree |  | 0.084*** |  | 0.002 |
| A-Level |  | 0.023 |  | 0.001 |
| O-Level |  | 0.019 |  | -0.023* |
| Fam structure (2 parents=ref) |  |  |  |  |
| Sometimes lone-parent |  | -0.026* |  | -0.017* |
| Always lone-parent |  | -0.014 |  | 0.020 |
| Born outside the UK |  | 0.066** |  | 0.032* |
| Ethnic diversity at school |  | 0.001** |  | 0.001** |
| Five A-C incl E&M |  | 0.352*** |  | 0.203*** |
|  |  |  |  |  |
| Pseudo R2 | 0.112 | 0.307 | 0.099 | 0.264 |
| (N) | 8105 | 7489 | 8105 | 7489 |

Notes: * p < 0.05; ** p<0.01; *** p<0.001. ‘Five A-C incl E&M’ refers to ‘Achieved 5 or more GCSEs or equivalent at A*-C grade including English and Maths.

Table 7 Education, labour market position and income (£) by ethnicity (N=7,707)

|  | % degree | Labour market position (%) | | | | Gross pay (£) | Weekly income(£) |
| --- | --- | --- | --- | --- | --- | --- | --- |
|  | Salariat | Other | Unem | Inactive |
|  |  |  |  |  |  |  |  |
| White | 25 | 35 | 48 | 6 | 10 | 351 | 313 |
| B Caribbean | 28 | 25 | 58 | 11 | 7 | 270 | 227 |
| B African | 50 | 45 | 39 | 12 | 5 | 338 | 228 |
| Indian | 49 | 50 | 37 | 10 | 3 | 362 | 246 |
| Pakistani | 31 | 34 | 43 | 11 | 11 | 263 | 217 |
| Bangladeshi | 27 | 37 | 44 | 8 | 11 | 321 | 213 |
| Chinese | 45 | 54 | 36 | 9 | 0 | 394 | 224 |
| Mixed | 29 | 34 | 48 | 10 | 8 | 322 | 236 |
| Other | 47 | 37 | 43 | 13 | 6 | 339 | 227 |
|  |  |  |  |  |  |  |  |
| (All) | 27 | 36 | 48 | 7 | 9 | 347 | 300 |

Note: Full-time students are omitted in analysis of the labour market position. ‘Other’ refers to those in non-salariat’ jobs, and ‘Unem’ to the unemployed. Gross pay refers to gross weekly earnings from the main job but excludes the small number of respondents (N=36) with abnormally high pay (over £100 per hour) in accordance with government instructions on collection of earnings data. Continuous weekly income pertains to take-home income for cohort member and partner as derived from banded incomes (1=under 25 … 16=more than 1400).

Table 8 Average marginal effects (AME) on avoidance of worklessness (%) and gross weekly earnings (£) conditional on employment based on Heckman’s model

|  | | Avoidance  of worklessness (%) | | Growth weekly earnings (£) conditional on employment | |
| --- | --- | --- | --- | --- | --- |
| Parental class (routine = ref) |  | |  |  |  |
| Higher salariat | 0.264*** | | 0.108** | 161.80*** | 79.87*** |
| Lower salariat | 0.223*** | | 0.097** | 103.89*** | 41.86 |
| Intermediate | 0.177*** | | 0.066 | 83.43*** | 32.59 |
| Own account | 0.138*** | | 0.050 | 70.71*** | 28.76 |
| Supervisor & technician | 0.136*** | | 0.081* | 39.86* | 21.05 |
| Semi routine | 0.077* | | 0.060 | 21.20 | 3.09 |
| Ethnicity (White = ref) |  | |  |  |  |
| B Caribbean | -0.090* | | -0.071 | -52.56** | -50.54*** |
| B African | -0.083 | | -0.176*** | 49.34* | 0.35 |
| Indian | -0.056 | | -0.152*** | 66.89*** | 31.38* |
| Pakistani | -0.104** | | -0.139*** | -2.87 | -24.62 |
| Bangladeshi | -0.061 | | -0.113** | 22.88 | -9.63 |
| Chinese | -0.159 | | -0.132 | 125.89* | 76.11 |
| Mixed | -0.060 | | -0.070 | -0.17 | -3.59 |
| Other | -0.129* | | -0.171** | 70.12 | 38.15 |
| Female | -0.003 | | -0.001 | -88.23*** | -96.15*** |
| Marital status (single=ref) |  | |  |  |  |
| Married |  | | 0.013 |  | 33.61** |
| Divorced/separated |  | | -0.090 |  | -58.90** |
| Number of children in HH |  | | -0.069*** |  | -32.73*** |
| Parental education (low=ref) |  | |  |  |  |
| Degree+ |  | | 0.022 |  | 41.08** |
| Sub-degree |  | | 0.020 |  | 22.46 |
| A-Level |  | | 0.063** |  | 18.58 |
| O-Level |  | | 0.075*** |  | 22.21 |
| R’s education (low=ref) |  | |  |  |  |
| Degree+ |  | | 0.264*** |  | 124.98*** |
| Sub-degree |  | | 0.169*** |  | 70.99*** |
| A-Level |  | | 0.231*** |  | 92.72*** |
| O-Level |  | | 0.137*** |  | 53.38*** |
| Limiting LT illness | -0.152*** | | -0.130*** |  |  |
|  |  | |  |  |  |
| N | 6703 | | 6265 | 6703 | 6265 |

Note: Full-time students at Wave 8 were omitted from analysis.

Table 9 OLS regression of weakly take-home income (£)

|  | Model 1 | Model 2 | Model 3 | Model 4 |
| --- | --- | --- | --- | --- |
|  |  |  |  |  |
| Parental class (routine = ref) |  |  |  |  |
| Higher salariat | 102.79*** | 81.61*** | 52.05*** | 51.53*** |
| Lower salariat | 88.30*** | 72.82*** | 46.47*** | 45.58*** |
| Intermediate | 74.27*** | 62.31*** | 41.12*** | 40.93*** |
| Own account | 64.58*** | 51.41*** | 35.74*** | 35.10*** |
| Supervisor & technician | 53.25*** | 41.60*** | 30.18*** | 29.29*** |
| Semi routine | 16.85*** | 11.97*** | 4.90 | 4.55 |
| Ethnicity (White = ref) |  |  |  |  |
| B Caribbean | -81.27*** | -91.36*** | -89.65*** | -88.95*** |
| B African | -76.33*** | -88.68*** | -94.67*** | -94.78*** |
| Indian | -55.56*** | -69.23*** | -70.29*** | -70.53*** |
| Pakistani | -70.01*** | -85.27*** | -79.46*** | -78.98*** |
| Bangladeshi | -58.88*** | -80.89*** | -70.51*** | -70.50*** |
| Chinese | -77.49*** | -84.45*** | -80.68*** | -79.62*** |
| Mixed | -77.49*** | -83.62*** | -83.92*** | -83.73*** |
| Other | -76.58*** | -85.80*** | -86.86*** | -88.30*** |
| Female | 32.09*** | 31.11*** | 27.58*** | 27.85*** |
| Marital status (single=ref) |  |  |  |  |
| Married |  | 6.79*** | 4.63* | 4.97** |
| Divorced/separated |  | -5.90 | -2.21 | -2.72 |
| Number of children in HH |  | -12.29*** | -4.87*** | -2.92** |
| Health status (GHQ12) |  | -0.66*** | -0.57** | -0.36 |
| Parental education (low=ref) |  |  |  |  |
| Degree+ |  |  | 36.76*** | 35.42*** |
| Sub-degree |  |  | 38.19*** | 36.53*** |
| A-Level |  |  | 34.53*** | 33.50*** |
| O-Level |  |  | 33.55*** | 32.76*** |
| R’s education (low=ref) |  |  |  |  |
| Degree+ |  |  | 41.95*** | 37.13*** |
| Sub-degree |  |  | 29.35*** | 26.32*** |
| A-Level |  |  | 35.53*** | 32.34*** |
| O-Level |  |  | 20.83*** | 19.00*** |
| LM position (workless=ref) |  |  |  |  |
| Salariat |  |  |  | 17.26*** |
| Non-salariat |  |  |  | 9.47*** |
|  |  |  |  |  |
| Constant | 232.88*** | 263.59*** | 224.81*** | 216.56*** |
| R2 | 0.413 | 0.523 | 0.592 | 0.596 |
| N | 7,231 | 6,913 | 6,473 | 6106 |
